# Supplementary material for: Facile preparation of biocompatible Ti2O3 nanoparticles for second near-infrared window photothermal therapy
Source: Royal Society of Chemistry journal article supplement (doi:10.1039/c8tb02079e), 2018-01-01
Supplement: c8tb02079e1.pdf [file c8tb02079e1.pdf]

## Supplementary Information

### Facile preparation of biocompatible $\text{Ti}_2\text{O}_3$ nanoparticles for second near-infrared window photothermal therapy

Jinhua Zeng <sup>a,b,c</sup>, Ming Wu <sup>b,c</sup>, Shanyou Lan <sup>a,b,c</sup>, Jiong Li <sup>b,c</sup>, Xiaolong Zhang <sup>b,c</sup>, Jingfeng Liu <sup>a,b,c</sup>,  
Xiaolong Liu <sup>b,c</sup>, Zuwu Wei <sup>b,c</sup>\*, and Yongyi Zeng <sup>a,b,c</sup>\*

<sup>a</sup> Liver Disease Center, the First Affiliated Hospital of Fujian Medical University, Fuzhou 350005, P.R. China

<sup>b</sup> The United Innovation of Mengchao Hepatobiliary Technology Key Laboratory of Fujian Province, Mengchao Hepatobiliary Hospital of Fujian Medical University, Fuzhou 350025, P.R. China

<sup>c</sup> The Liver Center of Fujian Province, Fujian Medical University, Fuzhou 350025, P.R. China

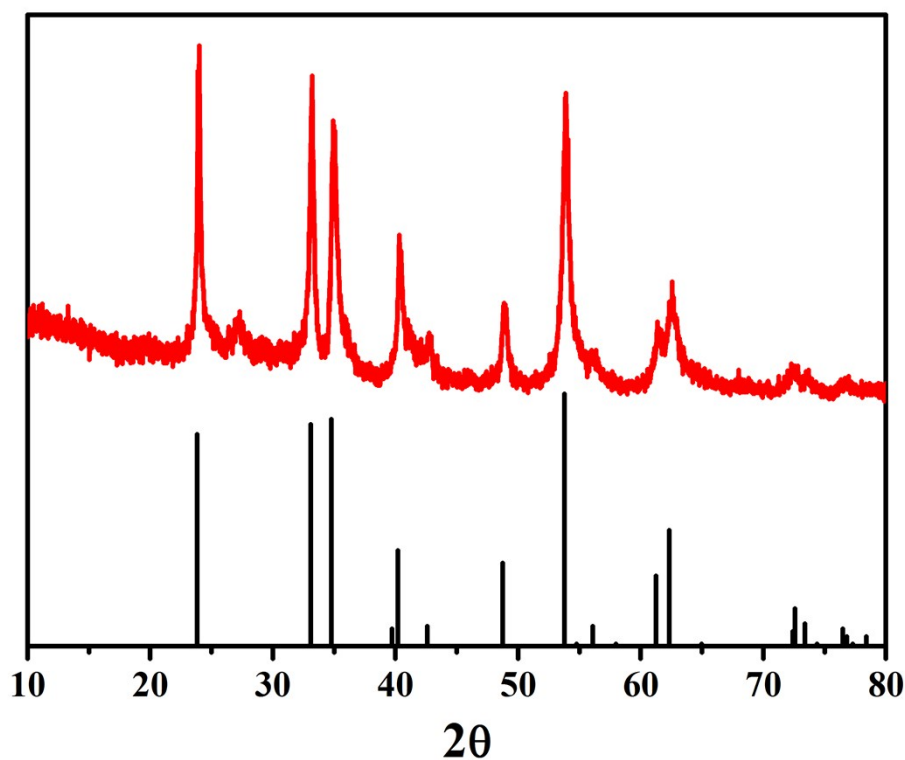

Fig. S1 Wide-angle X-ray diffraction pattern of  $\text{Ti}_2\text{O}_3$  nanoparticles.

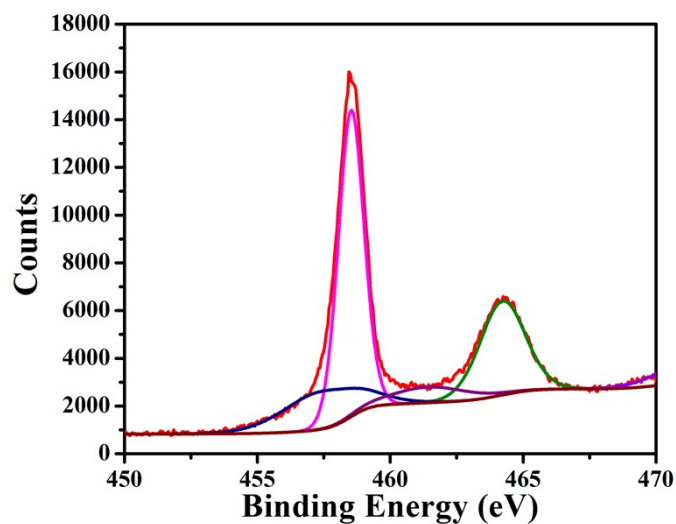

Fig. S2 XPS Ti2p orbitals of  $\text{Ti}_2\text{O}_3$  nanoparticles.

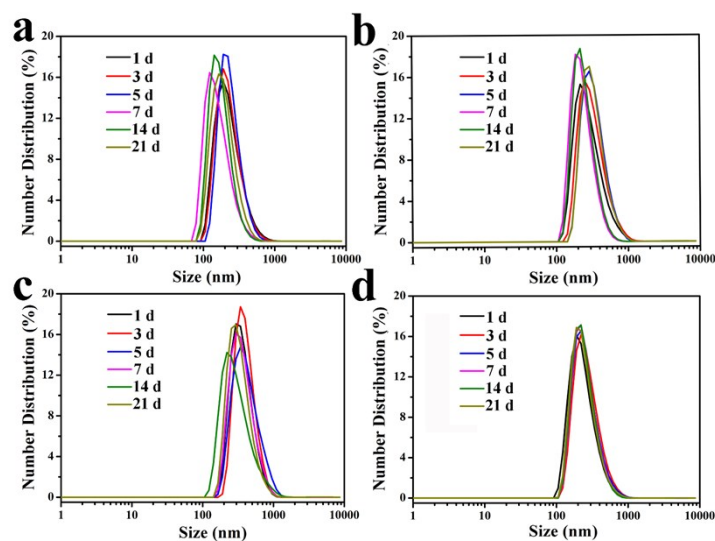

Fig. S3 Size distributions of  $\text{Ti}_2\text{O}_3@HA$  nanoparticles in (a) water, (b) PBS, (c) DMEM and (d) FBS measured by DLS.

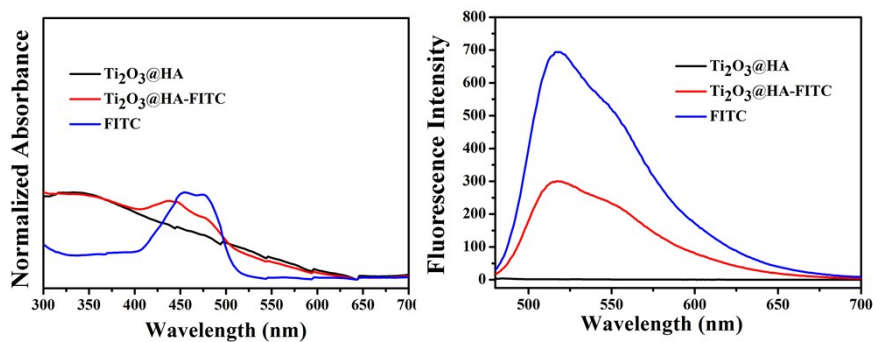

Fig. S4 The absorption spectra (a) and fluorescence spectra (b) of  $\text{Ti}_2\text{O}_3@HA-FITC$ .

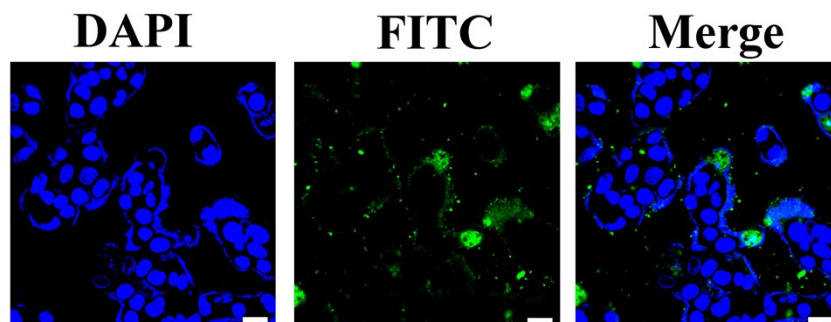

**Fig. S5** CLSM images of NIH3T3 cells incubated with  $\text{Ti}_2\text{O}_3@HA$  for 6 h.

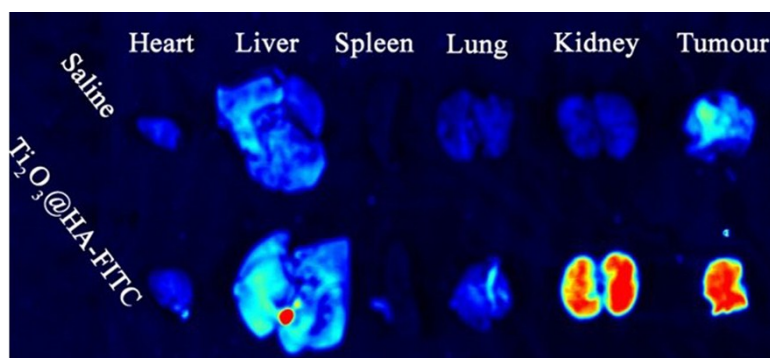

**Fig. S6** *Ex vivo* fluorescence images of major organs obtained from mice with indicated treated after 12 h of  $\text{Ti}_2\text{O}_3@HA-FITC$  injection.

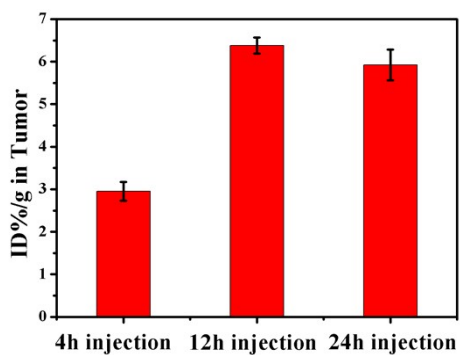

**Fig. S7** Concentration of  $\text{Ti}_2\text{O}_3@HA$  nanoparticles at tumor sites after 4h, 12h and 24h of injection.

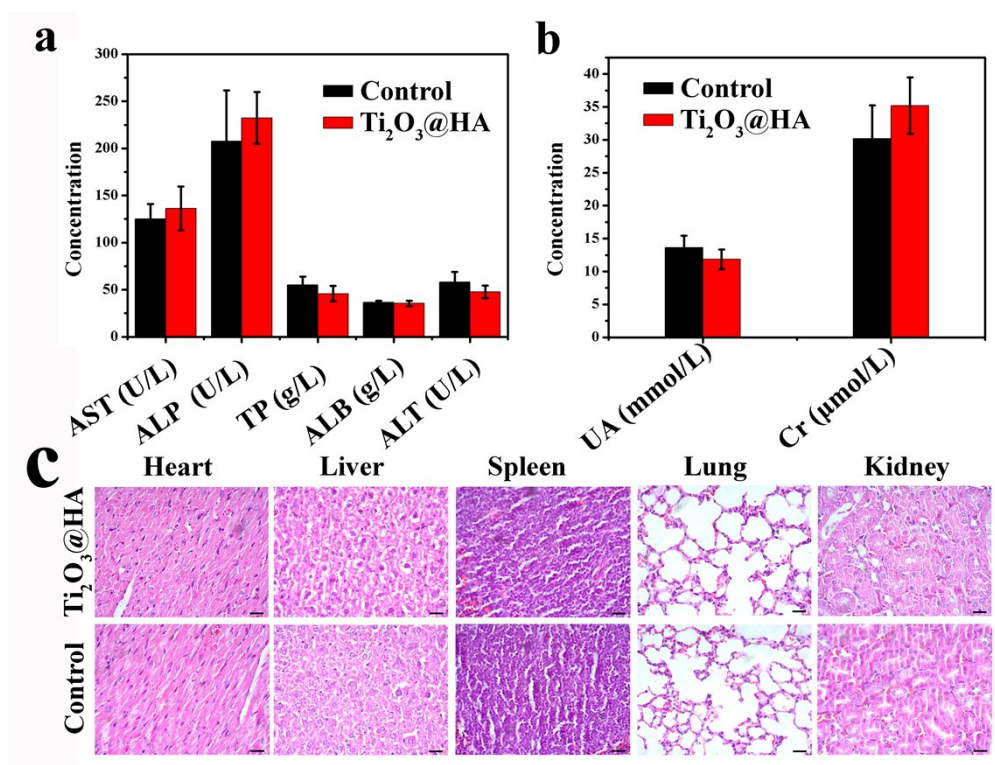

**Fig. S8** Serum biological parameters obtained from mice at 7 days after injected with Ti<sub>2</sub>O<sub>3</sub>@HA (n=4), or PBS solution (n=4, control) (A); hematoxylin and eosin (H&E)-stained tissue sections from mice at 7 days after injected with Ti<sub>2</sub>O<sub>3</sub>@HA (n=4), or PBS solution (n=4, control).

## Materials

The Titanium(III) oxide (99.9%, 100 mesh) was purchased from J&K Scientific Ltd. 3-aminopropyl-triethoxysilane was supplied by TCI. Hyaluronic acid (Mw = 61000) was purchased from Shandong Furuida Biological Biomedicine Co., Ltd. 4', 6-diamidino-2-phenylindole (DAPI) and Cell Counting Kit-8 (CCK-8) were obtained from Dojindo Molecular Technologies. LIVE/DEAD Viability/Cytotoxicity Kit and Annexin V-Fluoroisothio cyanate (FITC)/propidium iodide (PI) apoptosis detection kit were provided by Invitrogen. All other chemicals, if not specified, were used as received without further purification.

## Calculation of the photothermal conversion efficiency

To evaluate the photothermal conversion efficiency, the temperature change of the aqueous dispersion (200  $\mu\text{g mL}^{-1}$ ) was recorded as a function of time under continuous irradiation of the 1064 nm laser with a power density of 1.4  $\text{W}\cdot\text{cm}^{-2}$  until the solution reached a steady-state temperature.

The photothermal conversion efficiency,  $\eta$ , was calculated using Equation 1 described by previous reports<sup>1,2</sup>, where  $h$  is the heat transfer coefficient,  $A$  is the surface area of the container,  $T_{\text{max}}$  is the equilibrium temperature,  $T_{\text{Surr}}$  is ambient temperature of the surroundings,  $\Delta T_{\text{max}} = T_{\text{max}} - T_{\text{Surr}}$ ,  $I$  is incident laser power (1.4  $\text{W cm}^{-2}$ ), and  $A_{\lambda}$  is the absorbance of  $\text{Ti}_2\text{O}_3@\text{HA}$  at 1064 nm.  $Q_s$  is the heat associated with the light absorbance of the solvent, which is measured independently to be 25.2 mW using deionized water without nanoparticles.

$$\eta = \frac{hA\Delta T_{\text{max}} - Q_s}{I(1 - 10^{-A_{\lambda}})} \quad (1)$$

The value of  $hA$  is derived according to Equation 2:

$$\tau_s = \frac{m_D C_D}{hA} \quad (2)$$

Where  $\tau_s$  is the time constant of sample system,  $m_D$  and  $C_D$  are the mass (1 g) and heat capacity (4.2  $\text{J g}^{-1}$ ) of deionized water used as the solvent, respectively.

In order to obtain the  $hA$ , herein introduce  $\theta$ , which is defined as the ratio of  $\Delta T$  to  $\Delta T_{\text{max}}$ :

$$\theta = \frac{\Delta T}{\Delta T_{\text{max}}} \quad (3)$$

$hA$  can be determined by applying the linear time data from the cooling period versus  $-\ln\theta$  (Fig. 2d,e). Substituting  $hA$  value into Equation 1, the photothermal conversion efficiency ( $\eta$ ) of  $\text{Ti}_2\text{O}_3@\text{HA}$  can be calculated:

$$hA = m_D C_D / \tau_s = 4.2 \text{ J}/260; A\lambda = 0.834; \tau_s = 260; I = 1.4 \text{ W cm}^{-2}; \Delta T_{\max} = 33.9 \text{ }^\circ\text{C}$$

$$\eta = ((4.2/227.8) \times 33.9 - 0.0252) / (1.4 \times (1 - 10^{-0.834})) = 50.19\%$$

## References

1. M. Wang, K. Deng, W. Lu, X. Deng, K. Li, Y. Shi, B. Ding, Z. Cheng, B. Xing, G. Han, Z. Hou and J. Lin, *Adv. Mater.*, 2018, **30**, 1706747- 1706755.
2. X. Yu, A. Li, C. Zhao, K. Yang, X. Chen and W. Li, *ACS Nano*, 2017, **11**, 3990-4001.
